# Supplementary material for: Correlation Between the Posterior Tibial Slope, Proximal Tibial Angle, Distal Femoral Angle, and Femoral Intercondylar Notch Morphology and Posterior Cruciate Ligament Injury
Source: Research Square preprint supplement (doi:10.21203/rs.3.rs-7478907/v1), 2025-09-11
Supplement: Supplementary file 1 [file 6e612144f7eca062c03629a4.xlsx]

## Sheet: Sheet1
编号	姓名	性别	年龄	住院号	侧别	胫骨上角	股骨下角	髁间窝宽度	双髁间宽度	髁间窝深度	髁间角	胫骨平台后倾角	身高	体重	损伤机制	疼痛时间
1	邵静	女	47岁	10015288	左膝	91	79	22.1	65.89	29.92	47	6	164cm	55kg	外伤	1个月
2	赵锐斌	男	47岁	10329160	左膝	93	83	24.65	82.65	26.18	72	6	183cm	87kg	摔伤	15天
3	贺子莲	女	51岁	10579435	左膝	93	78	15.36	69.6	27.64	43	5	161cm	65kg	摔伤	12个月
4	胡凤玲	女	53岁	10626425	左膝	93	78	14.85	63.95	23.88	54	7	155cm	64kg	摔伤	2个月
5	宋强	男	19岁	10631055	左膝	92	80	21.23	73.67	27.94	61	7	183cm	85kg	车祸	23天
6	王晓冬	男	31岁	10631178	左膝	94	80	19	80.96	26.15	60	0	187cm	93kg	摔伤	40天
7	高天翔	男	15岁	10638623	左膝	96	80	18.95	76.35	31.26	44	4	165cm	66.5k g	扭伤	10天
8	左少武	男	36岁	10649720	左膝	96	81	16.94	67.17	31.21	33	12	168cm	70kg	扭伤	17天
9	郑冰洋	女	19岁	10652119	左膝	93	81	16.35	64.52	24.62	46	12	168cm	55kg	扭伤	1个月
10	谢大鹏	男	27岁	10653796	右膝	94	83	19.35	77.03	31.2	44	12	180cm	98kg	摔伤	45天
11	樊江琪	男	52岁	10656053	右膝	92	82	20.72	74.08	29.9	54	16	173cm	88kg	扭伤	1个月
12	马军	男	27岁	10613686	左膝	89	78	23.23	78.8	31.29	53	5	170cm	60kg	车祸	2个月
13	张巍	男	28岁	10654432	右膝	96	80					5	175cm	83kg	摔伤	14天
14	周巧玲	女	48岁	10663984	右膝	90	81					9	165cm	70kg	车祸	21天
15	刘成	男	40岁	10213120	右膝	95	78	19.13	76.95	29.78	49	8	165cm	66.5k g	摔伤	3个月
16	杜香雨	女	38岁	10487756	左膝	92	79	17.73	67.35	27.05	51	11	163cm	70kg	摔伤	3个月
17	赵金武	男	49岁	10488704	左膝	92	81	19.43	76.69	27.61	55	8	173cm	70kg	扭伤	25天
18	王小利	女	51岁	10493868	左膝	96	81	16.39	64.18	25.29	47	6	162cm	65kg	摔伤	3个月
19	李丹	女	30岁	10517734	左膝	93	77	17.92	65.55	25.61	50	5	161cm	65kg	扭伤	8个月
20	柴慧	女	31岁	10530919	右膝	95	80	19.39	68.97	24.67	59	10	177cm	60kg	车祸	10天
21	裴学芳	女	45岁	10541345	左膝	95	80	16.2	65.19	27.01	48	9	161cm	60kg	摔伤	11天
22	赵芳	女	24岁	10568877	右膝	96	78	15.46	61.6	26.8	45	5	162cm	80kg	摔伤	5天
23	谢红霞	女	48岁	10569145	右膝	93	82	15.72	66.49	26.05	52	11	163cm	73kg	摔伤	1个月
24	史学义	男	62岁	10556701	左膝	90	79	20.32	75.99	30.72	50	10	165cm	67kg	摔伤	7天
25	王龙飞	男	29岁	10555946	右膝	92	85					11	171cm	90kg	摔伤	8天
26	耿昀哲	男	13岁	10529210	右膝	91	85	15.73	72.36	25.61	47	12	168cm	75kg	扭伤	6个月
27	王生龙	男	48岁	10536574	右膝	90	78	20.61	67.64	26.16	62	12	165cm	66.5k g	摔伤	4个月
28	万齐家	男	33岁	10641994	左膝	93	85	15.24	73.61	31.26	36	12	175cm	81kg	摔伤	1个月
29	王宇琪	男	13岁	10644851	右膝	96	82	18.8	78.92	29.86	55	7	172cm	70kg	摔伤	7天
30	罗韩堃	男	25岁	10650123	左膝	94	83	26	80.9	32.2	57	9	175cm	95kg	摔伤	1个月
31	刘瑞	女	37岁	10622756	右膝	91	82	14.89	65.89	26.64	41	12	158cm	50kg	车祸	7天
32	化新虎	男	51岁	10622807	左膝	94	83	21.86	78.87	25.92	69	4	168cm	75kg	摔伤	11天
33	冯玉淑	女	51岁	10614911	左膝	93	79					2	151cm	54kg	摔伤	1个月
34	李硕益	男	17岁	10486170	右膝	94	79	22.91	80.42	31	54	6	175cm	78kg	摔伤	3个月
35	高仲海	男	43岁	10523844	右膝	96	80	19.2	77.31	27.83	45	5	172cm	85kg	车祸	2个月
36	王万春	男	42岁	10524367	左膝	91	80	24.32	79.82	29.53	57	4	178cm	61kg	摔伤	1个月
37	尹浩喆	男	15岁	10533654	右膝	92	80	21.35	77.26	28.43	60	8	175cm	75kg	扭伤	12个月
38	韩镇宇	男	18岁	10545196	右膝	97	81	22.14	76.36	34.75	41	9	187cm	73kg	扭伤	3个月
39	陈静	女	32岁	10105103	左膝	93	81	19.34	66.56	26.05	55	9	163cm	46kg	车祸	6个月
40	何家杰	男	18岁	10683859	右膝	92	82	21.79	78.06	31.57	46	14	170cm	77.5kg	扭伤	6个月
41	常晓辉	男	39岁	10720919	左膝	94	83	20.71	77.75	29.59	52	6	170cm	85kg	摔伤	9天
42	谷宁	男	38岁	10756151	左膝	95	81	19.5	80.07	30.02	46	4	178cm	122.5kg	车祸	5个月
43	马忠智	男	56岁	10250611	左膝	94	81	22.98	78.9	27.64	53	6	175cm	80kg	摔伤	10天
44	吴晶	女	45岁	10469919	左膝	96	79	17.92	74.53	28.08	47	1	173cm	100kg	摔伤	1个月
45	贾沄昊	男	22岁	10669159	右膝	93	83					14	180cm	57.5kg	摔伤	3个月
46	王月英	女	57岁	10677549	左膝	91	83	18.67	69.13	25.7	49	10	167cm	65kg	摔伤	3个月
47	郭义	男	53岁	10687946	左膝	98	78	21.2	74.02	30.65	42	1	170cm	85kg	车祸	1天
48	郭正凯	男	36岁	10689590	右膝	94	84	14.51	71.56	25.08	40	13	175cm	70kg	摔伤	1个月
49	吴书文	男	42岁	10691990	右膝	96	80	18.61	78.66	30.66	44	6	167cm	80kg	扭伤	1个月
50	王茜玲	女	24岁	10703108	右膝	94	81	20.06	70.02	27.15	53	7	160cm	72.5kg	车祸	14天
51	王思巍	男	18岁	10719485	右膝	97	83	19.07	77.03	26.61	58	13	176cm	80kg	扭伤	3个月
52	安翠英	女	51岁	10721484	左膝	91	79	19.4	70.81	29.81	46	9	165cm	66kg	扭伤	12个月
53	马俊杰	男	43岁	10724702	左膝	95	77	22.18	76.16	35.77	42	1	174cm	60kg	摔伤	15天
54	李江飞	男	26岁	10726609	右膝	92	86	21.56	79.52	27.46	63	9	180cm	98kg	车祸	3天
55	孙潇	男	34岁	10732533	右膝	96	81	16.18	77.3	31.08	36	5	178cm	100kg	摔伤	21天
56	王勤	女	51岁	10735458	右膝	94	79	18.52	68.22	28.37	43	6	165cm	70kg	摔伤	8天
57	马建军	女	53岁	10747961	左膝	91	80	14.19	65.17	26.17	34	10	163cm	60.5kg	摔伤	19天
58	闫逸轩	男	16岁	10767046	右膝	97	80	22.62	80.73	33.96	45	5	182cm	80kg	摔伤	3天
59	宋守善	男	60岁	10769135	右膝	93	81	23.44	72.27	31.27	46	11	165cm	70kg	车祸	21天
60	靳文政	男	57岁	11016257	右膝	93	82	17.27	75.56	24.52	63	2	169cm	74kg	扭伤	21天
61	丁波	男	37岁	10067745	右膝	95	80	21.57	76.38	30.18	55	6	183cm	92kg	扭伤	72天
62	布日德	男	28岁	11060191	左膝	91	83	21.59	75.78	33.51	45	7	178cm	95kg	车祸	3个月
63	王涤	男	16岁	11040964	右膝	92	83	24.14	79.13	26.7	68	6	173cm	53kg	车祸	3年
64	高彩红	女	42岁	11007141	右膝	91	82	17.28	67.33	27.8	41	6	160cm	60kg	扭伤	50天
65	王金会	女	48岁	10595163	左膝	91	79	15.83	67.4	31.3	33	10	173cm	72kg	车祸	1个月
66	李小红	女	29岁	11007799	右膝	93	78	20.56	67.53	26.78	56	10	160cm	50kg	摔伤	1个月
67	王杰	男	39岁	11011460	右膝	97	83	19.82	80.86	30.82	45	10	175cm	92kg	摔伤	5天
68	陈俊祺	男	56岁	11017134	左膝	96	80	15.79	73.45	27.86	32	6	170cm	52kg	摔伤	4个月
69	武青芸	女	36岁	10064332	右膝	96	79	19.77	66.04	28.3	52	8	163cm	67kg	摔伤	2天
70	吴海兵	男	42岁	11028911	右膝	99	79	24.74	81.43	30.02	61	3	176cm	80kg	扭伤	13天
71	巍康	男	24岁	11030175	右膝	99	83	22.9	81.13	29.27	57	7	178cm	76kg	车祸	7天
72	简艳丽	女	41岁	11032927	右膝	94	80	15.57	66.53	26.32	42	10	160cm	61kg	摔伤	80天
73	拜建辉	男	30岁	11034309	右膝	96	79	20.61	74.48	27.84	53	5	175cm	90kg	摔伤	14天
74	陆伟	男	34岁	11035915	右膝	98	79	17.11	72.7	31.02	35	11	174cm	83kg	扭伤	8天
75	王淅	女	46岁	11039515	右膝	94	84	18.29	68.37	27.29	53	8	168cm	53kg	摔伤	2个月
76	张朋飞	男	45岁	11045458	右膝	95	82	18.96	74.31	28.7	50	4	168cm	90kg	摔伤	4天
77	田肖清凡	女	27岁	11050511	右膝	97	83	18.68	66.45	27.25	49	17	165cm	50kg	车祸	12天
78	徐亚波	女	44岁	11050738	右膝	93	80	19.02	62.18	25.14	54	11	157cm	65.5kg	摔伤	4个月
79	陈甜甜	女	20岁	11051550	右膝	94	83	20.35	65.71	27.19	54	6	163cm	70kg	外伤	4天
80	吴燕蓉	女	40岁	11059879	右膝	92	82	16.85	62.35	25.23	45	10	165cm	72.5kg	摔伤	2年
81	杨晓梅	女	37岁	11062000	右膝	93	83	17.86	63.82	25.49	51	4	160cm	64kg	摔伤	3年
82	韩进燕	女	36岁	10217308	右膝	96	82	16.42	68.28	25.44	51	17	159cm	70kg	摔伤	1个月
83	王瑞龙	男	26岁	11066263	左膝	97	81	20.64	70.51	26.54	59	6	158cm	60kg	扭伤	8天
84	张金霞	女	43岁	11067953	右膝	97	81	14.84	66.79	26.46	41	9	160cm	60kg	摔伤	5天
85	李轩宇	男	36岁	10226800	左膝	99	81	22.45	80.71	30.62	46	5	175cm	75kg	摔伤	5个月

## Sheet: Sheet2
编号	姓名	性别	年龄	住院号	侧别	胫骨上角	股骨下角	髁间窝宽度	双髁间宽度	髁间窝深度	髁间角	胫骨平台后倾角	身高	体重	损伤机制	疼痛时间		疼痛时间
1	邵静	2	47	10015288	1	91	79	22.1	65.89	29.92	47	6	164	55	3	1		1个月
2	赵锐斌	1	47	10329160	1	93	83	24.65	82.65	26.18	72	6	183	87	3	0.5		15天
3	贺子莲	2	51	10579435	1	93	78	15.36	69.6	27.64	43	5	161	65	3	12		12个月
4	胡凤玲	2	53	10626425	1	93	78	14.85	63.95	23.88	54	7	155	64	3	2		2个月
5	宋强	1	19	10631055	1	92	80	21.23	73.67	27.94	61	7	183	85	1	0.75		23天
6	王晓冬	1	31	10631178	1	94	80	19	80.96	26.15	60	0	187	93	3	1.3		40天
7	高天翔	1	15	10638623	1	96	80	18.95	76.35	31.26	44	4	165	66.5	2	0.3		10天
8	左少武	1	36	10649720	1	96	81	16.94	67.17	31.21	33	12	168	70	2	0.6		17天
9	郑冰洋	2	19	10652119	1	93	81	16.35	64.52	24.62	46	12	168	55	2	1		1个月
10	谢大鹏	1	27	10653796	2	94	83	19.35	77.03	31.2	44	12	180	98	3	1.5		45天
11	樊江琪	1	52	10656053	2	92	82	20.72	74.08	29.9	54	16	173	88	2	1		1个月
12	马军	1	27	10613686	1	89	78	23.23	78.8	31.29	53	5	170	60	1	2		2个月
13	刘成	1	40	10213120	2	95	78	19.13	76.95	29.78	49	8	165	66.5	3	3		3个月
14	杜香雨	2	38	10487756	1	92	79	17.73	67.35	27.05	51	11	163	70	3	3		3个月
15	赵金武	1	49	10488704	1	92	81	19.43	76.69	27.61	55	8	173	70	2	0.8		25天
16	王小利	2	51	10493868	1	96	81	16.39	64.18	25.29	47	6	162	65	3	3		3个月
17	李丹	2	30	10517734	1	93	77	17.92	65.55	25.61	50	5	161	65	2	8		8个月
18	柴慧	2	31	10530919	2	95	80	19.39	68.97	24.67	59	10	177	60	1	0.3		10天
19	裴学芳	2	45	10541345	1	95	80	16.2	65.19	27.01	48	9	161	60	3	0.3		11天
20	赵芳	2	24	10568877	2	96	78	15.46	61.6	26.8	45	5	162	80	3	0.2		5天
21	谢红霞	2	48	10569145	2	93	82	15.72	66.49	26.05	52	11	163	73	3	1		1个月
22	史学义	1	62	10556701	1	90	79	20.32	75.99	30.72	50	10	165	67	3	0.2		7天
23	耿昀哲	1	13	10529210	2	91	85	15.73	72.36	25.61	47	12	168	75	2	6		6个月
24	王生龙	1	48	10536574	2	90	78	20.61	67.64	26.16	62	12	165	66.5	3	4		4个月
25	万齐家	1	33	10641994	1	93	85	15.24	73.61	31.26	36	12	175	81	3	1		1个月
26	王宇琪	1	13	10644851	2	96	82	18.8	78.92	29.86	55	7	172	70	3	0.2		7天
27	罗韩堃	1	25	10650123	1	94	83	26	80.9	32.2	57	9	175	95	3	1		1个月
28	刘瑞	2	37	10622756	2	91	82	14.89	65.89	26.64	41	12	158	50	1	0.2		7天
29	化新虎	1	51	10622807	1	94	83	21.86	78.87	25.92	69	4	168	75	3	0.4		11天
30	李硕益	1	17	10486170	2	94	79	22.91	80.42	31	54	6	175	78	3	3		3个月
31	高仲海	1	43	10523844	2	96	80	19.2	77.31	27.83	45	5	172	85	1	2		2个月
32	王万春	1	42	10524367	1	91	80	24.32	79.82	29.53	57	4	178	61	3	1		1个月
33	尹浩喆	1	15	10533654	2	92	80	21.35	77.26	28.43	60	8	175	75	2	12		12个月
34	韩镇宇	1	18	10545196	2	97	81	22.14	76.36	34.75	41	9	187	73	2	3		3个月
35	陈静	2	32	10105103	1	93	81	19.34	66.56	26.05	55	9	163	46	1	6		6个月
36	何家杰	1	18	10683859	2	92	82	21.79	78.06	31.57	46	14	170	77.5	2	6		6个月
37	常晓辉	1	39	10720919	1	94	83	20.71	77.75	29.59	52	6	170	85	3	0.3		9天
38	谷宁	1	38	10756151	1	95	81	19.5	80.07	30.02	46	4	178	122.5	1	5		5个月
39	马忠智	1	56	10250611	1	94	81	22.98	78.9	27.64	53	6	175	80	3	0.3		10天
40	吴晶	2	45	10469919	1	96	79	17.92	74.53	28.08	47	1	173	100	3	1		1个月
41	王月英	2	57	10677549	1	91	83	18.67	69.13	25.7	49	10	167	65	3	3		3个月
42	郭义	1	53	10687946	1	98	78	21.2	74.02	30.65	42	1	170	85	1	0.05		1天
43	郭正凯	1	36	10689590	2	94	84	14.51	71.56	25.08	40	13	175	70	3	1		1个月
44	吴书文	1	42	10691990	2	96	80	18.61	78.66	30.66	44	6	167	80	2	1		1个月
45	王茜玲	2	24	10703108	2	94	81	20.06	70.02	27.15	53	7	160	72.5	1	0.5		14天
46	王思巍	1	18	10719485	2	97	83	19.07	77.03	26.61	58	13	176	80	2	3		3个月
47	安翠英	2	51	10721484	1	91	79	19.4	70.81	29.81	46	9	165	66	2	12		12个月
48	马俊杰	1	43	10724702	1	95	77	22.18	76.16	35.77	42	1	174	60	3	0.5		15天
49	李江飞	1	26	10726609	2	92	86	21.56	79.52	27.46	63	9	180	98	1	0.1		3天
50	孙潇	1	34	10732533	2	96	81	16.18	77.3	31.08	36	5	178	100	3	0.7		21天
51	王勤	2	51	10735458	2	94	79	18.52	68.22	28.37	43	6	165	70	3	0.2		8天
52	马建军	2	53	10747961	1	91	80	14.19	65.17	26.17	34	10	163	60.5	3	0.6		19天
53	闫逸轩	1	16	10767046	2	97	80	22.62	80.73	33.96	45	5	182	80	3	0.1		3天
54	宋守善	1	60	10769135	2	93	81	23.44	72.27	31.27	46	11	165	70	1	0.7		21天
55	靳文政	1	57	11016257	2	93	82	17.27	75.56	24.52	63	2	169	74	2	0.7		21天
56	丁波	1	37	10067745	2	95	80	21.57	76.38	30.18	55	6	183	92	2	2.4		72天
57	布日德	1	28	11060191	1	91	83	21.59	75.78	33.51	45	7	178	95	1	3		3个月
58	王涤	1	16	11040964	2	92	83	24.14	79.13	26.7	68	6	173	53	1	36		3年
59	高彩红	2	42	11007141	2	91	82	17.28	67.33	27.8	41	6	160	60	2	1.7		50天
60	王金会	2	48	10595163	1	91	79	15.83	67.4	31.3	33	10	173	72	1	1		1个月
61	李小红	2	29	11007799	2	93	78	20.56	67.53	26.78	56	10	160	50	3	1		1个月
62	王杰	1	39	11011460	2	97	83	19.82	80.86	30.82	45	10	175	92	3	0.2		5天
63	陈俊祺	1	56	11017134	1	96	80	15.79	73.45	27.86	32	6	170	52	3	4		4个月
64	武青芸	2	36	10064332	2	96	79	19.77	66.04	28.3	52	8	163	67	3	0.1		2天
65	吴海兵	1	42	11028911	2	99	79	24.74	81.43	30.02	61	3	176	80	2	0.4		13天
66	巍康	1	24	11030175	2	99	83	22.9	81.13	29.27	57	7	178	76	1	0.2		7天
67	简艳丽	2	41	11032927	2	94	80	15.57	66.53	26.32	42	10	160	61	3	2.7		80天
68	拜建辉	1	30	11034309	2	96	79	20.61	74.48	27.84	53	5	175	90	3	0.5		14天
69	陆伟	1	34	11035915	2	98	79	17.11	72.7	31.02	35	11	174	83	2	0.2		8天
70	王淅	2	46	11039515	2	94	84	18.29	68.37	27.29	53	8	168	53	3	2		2个月
71	张朋飞	1	45	11045458	2	95	82	18.96	74.31	28.7	50	4	168	90	3	0.1		4天
72	田肖清凡	2	27	11050511	2	97	83	18.68	66.45	27.25	49	17	165	50	1	0.4		12天
73	徐亚波	2	44	11050738	2	93	80	19.02	62.18	25.14	54	11	157	65.5	3	4		4个月
74	陈甜甜	2	20	11051550	2	94	83	20.35	65.71	27.19	54	6	163	70	3	0.1		4天
75	吴燕蓉	2	40	11059879	2	92	82	16.85	62.35	25.23	45	10	165	72.5	3	24		2年
76	杨晓梅	2	37	11062000	2	93	83	17.86	63.82	25.49	51	4	160	64	3	36		3年
77	韩进燕	2	36	10217308	2	96	82	16.42	68.28	25.44	51	17	159	70	3	1		1个月
78	王瑞龙	1	26	11066263	1	97	81	20.64	70.51	26.54	59	6	158	60	2	0.3		8天
79	张金霞	2	43	11067953	2	97	81	14.84	66.79	26.46	41	9	160	60	3	0.2		5天
80	李轩宇	1	36	10226800	1	99	81	22.45	80.71	30.62	46	5	175	75	3	5		5个月

## Sheet: Sheet3
编号	姓名	性别	年龄	住院号	侧别	胫骨上角	股骨下角	髁间窝宽度	双髁间宽度	髁间窝深度	髁间角	胫骨平台后倾角		身高（cm）	体重（kg）	损伤机制	疼痛时间
1	聂凤	女	48岁	10267663	左膝			15.55	68.69	29.01	38			166	65	摔伤	20天
2	王吉成	男	47岁	10496672	左膝	91	82	16.92	74.54	28.14	38	8		177	68	无诱因	5年
3	郭颖东	男	51岁	11057554	右膝	96	83	18.59	76.55	28.7	39	9		168	64	摔伤	4月
4	刘兰英	女	55岁	11073363	右膝	91	81	17.22	67.72	26.03	47	10		160	54	摔伤	22天
5	马婷	女	38岁	11075696	左膝	94	79	17.54	65.93	25.12	48	7		162	53	摔伤	1周
6	雷冰霜	女	59岁	11075966	左膝	93	77	16.13	68.74	26.56	35	0		156	50	车祸	3天
7	刘志翔	男	21岁	11076646	左膝	92	79	15.95	77.47	30.51	35	10		180	70	摔伤	1天
8	高杰	男	36岁	11076825	左膝	95	84	17.41	73.24	33.25	29	7		185	87	扭伤	3月
9	邓圣元	男	25岁	11076907	左膝	92	83	19.82	77.31	30.04	47	9		180	74	扭伤	1周
10	马莲花	女	38岁	11077753	右膝	96	79	16.51	66.67	27.21	41	7		163	59	无诱因	6月
12	王文轩	男	16岁	11078615	左膝	94	81	19.54	75.92	31.41	48	7		185	87	扭伤	20天
13	窦琳翔	女	14岁	11078985	左膝	94	76	13.93	62.89	27.42	37	1		160	52	摔伤	1月
14	汤泽祥	男	55岁	10051757	左膝	94	85	16.19	71.13	29.04	37	18		168	70	无诱因	8月
15	马杰	男	37岁	10145298	右膝	97	81	20.35	77.6	30.01	51	11		175	80	扭伤	3月
16	任小蓉	女	34岁	10391830	左膝	92	79	19.49	69.49	23.29	69	14		158	48	摔伤	10天
17	李斌	男	52岁	11074391	右膝	96	83	19.69	72.22	27.59	41	11		165	74	无诱因	3月
18	马迎冬	男	52岁	11074776	左膝	93	81	21.6	80.65	27.7	52	6		178	70	车祸	1月
19	李翰泽	男	26岁	11074816	右膝	97	83	19.45	74.12	28.57	50	18		170	69	扭伤	21天
20	魏业红	男	50岁	11075143	右膝	96	83	20.17	77.97	28.47	48	15		170	69	扭伤	2天
21	詹佳庆	男	31岁	11072457	左膝	92	82	20.02	77.1	32.12	39	17		183	95	扭伤	8年
22	马利东	男	19岁	11073812	右膝	93	81	19.12	81.81	36.53	33	15		180	81	扭伤	14天
23	哈伦	男	35岁	11074068	左膝	90	83	16.42	77.46	28.53	49	11		182	88	无诱因	14天
24	杨文轩	男	30岁	10356824	右膝									180	89	扭伤	3年
25	张勇	男	27岁	11073373	右膝	91	85	22.08	81.87	31.88	38	15		175	80	扭伤	10年
26	王光付	男	59岁	10348586	右膝	96	84	21.13	78.23	26.05	60	10		168	65	无诱因	1年
27	杨嘉辉	男	25岁	11071137	右膝	94	81	20.74	75.73	31.2	47	15		185	95	扭伤	3天
28	王俊程	男	23岁	11072034	左膝	93	81	19.81	75.66	30.76	46	16		184	85	扭伤	14天
29	秦华樱	女	33岁	11072059	右膝	94	82	15.15	67.14	32.95	34	19		176	87	扭伤	8天
30	刘小平	男	53岁	11072313	右膝	94	80	17.78	72.1	33.21	30	17		181	85	摔伤	1月
31	马龙	男	25岁	11072443	左膝	97	81	18.87	71.93	31	39	10		170	62	无诱因	5天
32	尹正茂	男	25岁	11065262	右膝	95	83	21.46	83.59	34.73	37	19		198	140	扭伤	1月
33	贺景豪	男	25岁	11070526	右膝	95	83	16.31	71.82	25.46	50	12		172	85	扭伤	2月
34	贾美蓉	女	49岁	11070616	左膝			15.91	61.85	25.09	39			160	62	摔伤	8月
35	武梓晗	女	13岁	11069294	左膝	90	76	18.15	64.02	24.49	60	10		160	65	扭伤	3月
36	王芳芳	女	54岁	11069601	双膝	93	79	18.66	67.83	29.36	38	13		167	66	无诱因	10月
37	朱建国	男	55岁	10450930	左膝	88	81	20.04	77.79	27.83	47	8		175	72	扭伤	8天
38	金芮	女	23岁	11068620	右膝	95	79	16.57	64.26	25.36	44	11		162	57	扭伤	20天
39	多利荣	男	44岁	11069051	左膝	96	81	19.73	74.09	29.92	42	7		168	84	车祸	1月
40	许立军	男	49岁	11069167	左膝	91	81	17.27	74.09	28.78	43	7		165	75	摔伤	7天
41	姬雪健	男	28岁	11069265	右膝	94	80	21.84	78.75	29.02	54	7		182	92	扭伤	2月
42	刘秀梅	女	58岁	10091580	右膝	92	81	23.71	68.02	24.52	58	12		162	65	扭伤	1月
43	兰辉	男	44岁	11067692	右膝	95	81	21.13	72.01	26.8	51	15		167	79	扭伤	2月
44	闵锐	男	34岁	11067740	右膝	92	86	18.93	76.94	29.87	40	11		175	90	扭伤	8天
45	刘志鹏	男	38岁	10614263	左膝	96	83	21.68	78.25	30.07	53	4		180	84	扭伤	5天
46	海琴	女	48岁	11065492	左膝	93	80	20.34	70.97	24.76	56	7		160	61	扭伤	7天
47	汪武恒	男	40岁	11066195	左膝	95	77	20.84	76.68	27.7	53	6		171	70	无诱因	2月
48	禹临安	男	17岁	11066203	左膝	95	83	17.22	75.53	34.81	34	12		185	100	扭伤	1月
49	陈亮	男	57岁	11066600	右膝									170	80	无诱因	6月
50	李晨	女	36岁	10096681	左膝	92	78	18.08	64.29	27.12	48	8		166	69	扭伤	8天
51	王蕊馨	女	20岁	11063979	左膝	94	78	18.71	67.32	28.62	49	16		164	64	扭伤	7天
52	杨力群	男	16岁	11064800	左膝									180	70	摔伤	10天
53	刘星月	女	25岁	11064833	左膝	96	77	13.4	63.85	26.48	37	1		160	54	扭伤	7天
54	史丽媛	女	32岁	11062377	左膝	90	79	19.62	70.49	27.78	57	7		168	80	扭伤	1月
55	王娜	女	37岁	11060604	左膝	90	81	15.29	63.41	24.5	43	14		165	69	摔伤	5天
56	蔡波	男	37岁	11059149	左膝	95	84	21.9	77.16	31.24	37	17		178	90	摔伤	3月
57	邓洋	男	33岁	11059177	右膝	94	83	23.1	75.37	26.89	59	13		180	70	车祸	5月
58	甘磊	男	35岁	11057917	左膝	92	83	19.77	78.62	30.1	46	11		170	73	车祸	2月
59	王文飞	男	26岁	11054496	右膝	96	82	20.34	76.66	33.95	31	12		183	90	扭伤	5天
60	徐金花	女	57岁	11053196	右膝	94	78	16.73	64.85	25.18	49	11		155	71	摔伤	10天
61	杨磊	男	34岁	11053873	左膝	92	82	21.06	74.27	29.53	49	7		171	74	扭伤	1月
62	马海成	男	20岁	11052939	右膝	96	85	21.96	72.83	24.23	62	11		170	71	扭伤	5月
63	黄淑田	女	29岁	11052957	右膝	97	81	17.03	68.1	29.83	35	11		167	60	扭伤	5天
64	余佳	女	34岁	11053291	左膝	91	79	20.22	70.11	24.77	56	8		168	61	摔伤	15天
65	任凯杰	男	23岁	10553725	左膝	91	81	24.27	80.04	29.29	55	11		172	71	无诱因	14天
66	马上儿	女	26岁	11051895	左膝	91	81	15.63	67.76	26	43	9		164	75	扭伤	1月
67	申展	男	35岁	11051994	左膝	97	80	22.41	69.09	32.11	37	12		180	73	扭伤	5天
68	张海娟	女	41岁	11050451	左膝	92	77	17.3	67.21	25.08	47	13		168	70	无诱因	2月
69	王帅	男	38岁	10505049	右膝	95	79	18.44	75.6	30.22	43	7		172	76	扭伤	5天
70	张旭霞	女	39岁	10227549	左膝	90	81	17.77	70.22	26.72	42	12		161	57	扭伤	11天
71	赵嘉明	男	20岁	10610989	右膝	95	81	24.23	81.27	33.26	48	5		185	120	摔伤	6天
72	李翔	男	20岁	11046225	右膝	94	82	17.16	78.23	27.32	53	10		185	75	扭伤	26天
73	王学兵	男	65岁	11047431	左膝	91	82	18.75	75	25.18	60	10		171	65	扭伤	20天
74	马永凯	男	22岁	11048150	右膝	95	80	24.02	84.81	35.63	44	12		193	87	扭伤	2月
75	王恒	男	18岁	11045083	左膝	97	81	18.64	74.23	28.88	47	8		175	75	摔伤	1年
76	李秀娥	女	59岁	11046619	右膝			19	69.26	23.63	55			162	73	车祸	2月
77	田进虎	男	25岁	11045132	左膝	92	78	19.32	78.61	31.08	44	14		170	80	扭伤	1月
78	张东	男	32岁	11042096	左膝	94	81	19.57	72.37	26.34	52	9		168	80	扭伤	3天
79	潘薇	女	34岁	11042823	右膝	90	81	18.97	66.32	26.3	49	9		165	75	扭伤	5天
80	韩秀玲	女	49岁	11040961	左膝	87	83	16.88	66.55	23.78	47	16		158	55	无诱因	4年
81	杨东旭	男	37岁	11041046	右膝	94	82	21.35	78.24	29.25	47	12		176	75	扭伤	20天
82	李万虎	男	49岁	11037996	右膝	94	81	19.81	80.51	29.77	48	11		180	85	摔伤	16天
83	王玉鹏	男	30岁	11039745	左膝	95	81	20.66	80.86	29.65	51	17		172	100	扭伤	8天
84	王臻琪	男	19岁	11039767	右膝	92	82	22.38	79.47	32.95	46	9		183	112	扭伤	6周
85	吴学峰	男	44岁	11037444	右膝	92	82	17.53	70.11	26.19	41	14		160	60	扭伤	15天
86	朱永唤	女	48岁	11038438	左膝	94	80	17.33	67.19	25.43	46	9		158	58	扭伤	3年
87	李莉	女	37岁	11038467	右膝	94	79	18.92	67.53	26.52	47	17		162	57	摔伤	7天
88	毛生刚	男	59岁	10623865	右膝	95	85	24.15	79.98	28.84	61	7		175	65	无诱因	2月
89	杜丽平	女	49岁	10198869	左膝	88	82	17.12	71.7	26.75	44	18		168	71	扭伤	8月
90	罗永通	男	31岁	11032522	右膝	91	80	21.11	81.24	31.5	52	9		176	74	扭伤	4天
91	李春年	男	37岁	11032575	左膝	96	81	22.17	76.54	29.65	50	14		179	75	扭伤	11天
92	马丰霞	女	48岁	11032596	左膝	93	78	18.87	69.22	25.13	49	16		165	64	无诱因	1年
93	冯浩	男	27岁	11032919	右膝	95	82	21.34	75.36	21.34	63	12		173	60	摔伤	2年
94	刘乙锌	男	28岁	11032958	右膝	96	80	20.69	77.58	30.34	45	12		176	70	扭伤	7天
95	赵冬涛	男	44岁	10313011	右膝	95	82	19.94	72.36	27.58	52	15		162	70	扭伤	19天
96	白彬	女	51岁	10614688	右膝	94	81	15.49	67.57	24.85	46	14		170	72	摔伤	1月

## Sheet: Sheet4
姓名	性别	年龄	侧别	胫骨上角	股骨下角	髁间窝宽度	双髁间宽度	髁间窝深度	髁间角	胫骨平台后倾角	身高（cm）	体重（kg）	损伤机制	疼痛时间		疼痛时间	住院号
王吉成	1	47	1	91	82	16.92	74.54	28.14	38	8	177	68	4	60		5年	10496672
郭颖东	1	51	2	96	83	18.59	76.55	28.7	39	9	168	64	3	4		4月	11057554
刘兰英	2	55	2	91	81	17.22	67.72	26.03	47	10	160	54	3	0.7		22天	11073363
马婷	2	38	1	94	79	17.54	65.93	25.12	48	7	162	53	3	0.2		1周	11075696
雷冰霜	2	59	1	93	77	16.13	68.74	26.56	35	0	156	50	1	0.1		3天	11075966
刘志翔	1	21	1	92	79	15.95	77.47	30.51	35	10	180	70	3	0.1		1天	11076646
高杰	1	36	1	95	84	17.41	73.24	33.25	29	7	185	87	2	3		3月	11076825
邓圣元	1	25	1	92	83	19.82	77.31	30.04	47	9	180	74	2	0.2		1周	11076907
马莲花	2	38	2	96	79	16.51	66.67	27.21	41	7	163	59	4	6		6月	11077753
王文轩	1	16	1	94	81	19.54	75.92	31.41	48	7	185	87	2	0.7		20天	11078615
窦琳翔	2	14	1	94	76	13.93	62.89	27.42	37	1	160	52	3	1		1月	11078985
汤泽祥	1	55	1	94	85	16.19	71.13	29.04	37	18	168	70	4	8		8月	10051757
马杰	1	37	2	97	81	20.35	77.6	30.01	51	11	175	80	2	3		3月	10145298
任小蓉	2	34	1	92	79	19.49	69.49	23.29	69	14	158	48	3	0.3		10天	10391830
李斌	1	52	2	96	83	19.69	72.22	27.59	41	11	165	74	4	3		3月	11074391
马迎冬	1	52	1	93	81	21.6	80.65	27.7	52	6	178	70	1	1		1月	11074776
李翰泽	1	26	2	97	83	19.45	74.12	28.57	50	18	170	69	2	0.7		21天	11074816
魏业红	1	50	2	96	83	20.17	77.97	28.47	48	15	170	69	2	0.1		2天	11075143
詹佳庆	1	31	1	92	82	20.02	77.1	32.12	39	17	183	95	2	96		8年	11072457
马利东	1	19	2	93	81	19.12	81.81	36.53	33	15	180	81	2	0.5		14天	11073812
哈伦	1	35	1	90	83	16.42	77.46	28.53	49	11	182	88	4	0.5		14天	11074068
张勇	1	27	2	91	85	22.08	81.87	31.88	38	15	175	80	2	120		10年	11073373
王光付	1	59	2	96	84	21.13	78.23	26.05	60	10	168	65	4	12		1年	10348586
杨嘉辉	1	25	2	94	81	20.74	75.73	31.2	47	15	185	95	2	0.1		3天	11071137
王俊程	1	23	1	93	81	19.81	75.66	30.76	46	16	184	85	2	0.5		14天	11072034
秦华樱	2	33	2	94	82	15.15	67.14	32.95	34	19	176	87	2	0.3		8天	11072059
刘小平	1	53	2	94	80	17.78	72.1	33.21	30	17	181	85	3	1		1月	11072313
马龙	1	25	1	97	81	18.87	71.93	31	39	10	170	62	4	0.2		5天	11072443
尹正茂	1	25	2	95	83	21.46	83.59	34.73	37	19	198	140	2	1		1月	11065262
贺景豪	1	25	2	95	83	16.31	71.82	25.46	50	12	172	85	2	2		2月	11070526
武梓晗	2	13	1	90	76	18.15	64.02	24.49	60	10	160	65	2	3		3月	11069294
王芳芳	2	54	2	93	79	18.66	67.83	29.36	38	13	167	66	4	10		10月	11069601
朱建国	1	55	1	88	81	20.04	77.79	27.83	47	8	175	72	2	0.3		8天	10450930
金芮	2	23	2	95	79	16.57	64.26	25.36	44	11	162	57	2	0.7		20天	11068620
多利荣	1	44	1	96	81	19.73	74.09	29.92	42	7	168	84	1	1		1月	11069051
许立军	1	49	1	91	81	17.27	74.09	28.78	43	7	165	75	3	0.2		7天	11069167
姬雪健	1	28	2	94	80	21.84	78.75	29.02	54	7	182	92	2	2		2月	11069265
刘秀梅	2	58	2	92	81	23.71	68.02	24.52	58	12	162	65	2	1		1月	10091580
兰辉	1	44	2	95	81	21.13	72.01	26.8	51	15	167	79	2	2		2月	11067692
闵锐	1	34	2	92	86	18.93	76.94	29.87	40	11	175	90	2	0.3		8天	11067740
刘志鹏	1	38	1	96	83	21.68	78.25	30.07	53	4	180	84	2	0.2		5天	10614263
海琴	2	48	1	93	80	20.34	70.97	24.76	56	7	160	61	2	0.2		7天	11065492
汪武恒	1	40	1	95	77	20.84	76.68	27.7	53	6	171	70	4	2		2月	11066195
禹临安	1	17	1	95	83	17.22	75.53	34.81	34	12	185	100	2	1		1月	11066203
李晨	2	36	1	92	78	18.08	64.29	27.12	48	8	166	69	2	0.3		8天	10096681
王蕊馨	2	20	1	94	78	18.71	67.32	28.62	49	16	164	64	2	0.2		7天	11063979
刘星月	2	25	1	96	77	13.4	63.85	26.48	37	1	160	54	2	0.2		7天	11064833
史丽媛	2	32	1	90	79	19.62	70.49	27.78	57	7	168	80	2	1		1月	11062377
王娜	2	37	1	90	81	15.29	63.41	24.5	43	14	165	69	3	0.2		5天	11060604
蔡波	1	37	1	95	84	21.9	77.16	31.24	37	17	178	90	3	3		3月	11059149
邓洋	1	33	2	94	83	23.1	75.37	26.89	59	13	180	70	1	5		5月	11059177
甘磊	1	35	1	92	83	19.77	78.62	30.1	46	11	170	73	1	2		2月	11057917
王文飞	1	26	2	96	82	20.34	76.66	33.95	31	12	183	90	2	0.2		5天	11054496
徐金花	2	57	2	94	78	16.73	64.85	25.18	49	11	155	71	3	0.3		10天	11053196
杨磊	1	34	1	92	82	21.06	74.27	29.53	49	7	171	74	2	1		1月	11053873
马海成	1	20	2	96	85	21.96	72.83	24.23	62	11	170	71	2	5		5月	11052939
黄淑田	2	29	2	97	81	17.03	68.1	29.83	35	11	167	60	2	0.2		5天	11052957
余佳	2	34	1	91	79	20.22	70.11	24.77	56	8	168	61	3	0.5		15天	11053291
任凯杰	1	23	1	91	81	24.27	80.04	29.29	55	11	172	71	4	0.5		14天	10553725
马上儿	2	26	1	91	81	15.63	67.76	26	43	9	164	75	2	1		1月	11051895
申展	1	35	1	97	80	22.41	69.09	32.11	37	12	180	73	2	0.2		5天	11051994
张海娟	2	41	1	92	77	17.3	67.21	25.08	47	13	168	70	4	2		2月	11050451
王帅	1	38	2	95	79	18.44	75.6	30.22	43	7	172	76	2	0.2		5天	10505049
张旭霞	2	39	1	90	81	17.77	70.22	26.72	42	12	161	57	2	0.4		11天	10227549
赵嘉明	1	20	2	95	81	24.23	81.27	33.26	48	5	185	120	3	0.2		6天	10610989
李翔	1	20	2	94	82	17.16	78.23	27.32	53	10	185	75	2	0.9		26天	11046225
王学兵	1	65	1	91	82	18.75	75	25.18	60	10	171	65	2	0.7		20天	11047431
马永凯	1	22	2	95	80	24.02	84.81	35.63	44	12	193	87	2	2		2月	11048150
王恒	1	18	1	97	81	18.64	74.23	28.88	47	8	175	75	3	12		1年	11045083
田进虎	1	25	1	92	78	19.32	78.61	31.08	44	14	170	80	2	1		1月	11045132
张东	1	32	1	94	81	19.57	72.37	26.34	52	9	168	80	2	0.1		3天	11042096
潘薇	2	34	2	90	81	18.97	66.32	26.3	49	9	165	75	2	0.2		5天	11042823
韩秀玲	2	49	1	87	83	16.88	66.55	23.78	47	16	158	55	4	48		4年	11040961
杨东旭	1	37	2	94	82	21.35	78.24	29.25	47	12	176	75	2	0.7		20天	11041046
李万虎	1	49	2	94	81	19.81	80.51	29.77	48	11	180	85	3	0.5		16天	11037996
王玉鹏	1	30	1	95	81	20.66	80.86	29.65	51	17	172	100	2	0.3		8天	11039745
王臻琪	1	19	2	92	82	22.38	79.47	32.95	46	9	183	112	2	1.4		6周	11039767
吴学峰	1	44	2	92	82	17.53	70.11	26.19	41	14	160	60	2	0.5		15天	11037444
朱永唤	2	48	1	94	80	17.33	67.19	25.43	46	9	158	58	2	36		3年	11038438
李莉	2	37	2	94	79	18.92	67.53	26.52	47	17	162	57	3	0.2		7天	11038467
毛生刚	1	59	2	95	85	24.15	79.98	28.84	61	7	175	65	4	2		2月	10623865
杜丽平	2	49	1	88	82	17.12	71.7	26.75	44	18	168	71	2	8		8月	10198869
罗永通	1	31	2	91	80	21.11	81.24	31.5	52	9	176	74	2	0.1		4天	11032522
李春年	1	37	1	96	81	22.17	76.54	29.65	50	14	179	75	2	0.4		11天	11032575
马丰霞	2	48	1	93	78	18.87	69.22	25.13	49	16	165	64	4	12		1年	11032596
冯浩	1	27	2	95	82	21.34	75.36	21.34	63	12	173	60	3	0.1		2年	11032919
刘乙锌	1	28	2	96	80	20.69	77.58	30.34	45	12	176	70	2	0.2		7天	11032958
赵冬涛	1	44	2	95	82	19.94	72.36	27.58	52	15	162	70	2	0.6		19天	10313011
白彬	2	51	2	94	81	15.49	67.57	24.85	46	14	170	72	3	1		1月	10614688

## Sheet: Sheet5
敏感度	1 - 特异性	特异度	约登指数			敏感度	1 - 特异性	特异度	约登指数
0.5	0.303	0.697	0.197			0.438	0.079	0.921	0.359
0.388	0.191	0.809	0.197			0.775	0.438	0.562	0.337
0.463	0.27	0.73	0.193			0.575	0.27	0.73	0.305
0.425	0.236	0.764	0.189			0.663	0.36	0.64	0.303
0.325	0.157	0.843	0.168			0.513	0.213	0.787	0.3
0.538	0.371	0.629	0.167			0.838	0.562	0.438	0.276
0.913	0.764	0.236	0.149			0.925	0.674	0.326	0.251
0.9	0.753	0.247	0.147			0.95	0.708	0.292	0.242
0.75	0.607	0.393	0.143			0.262	0.056	0.944	0.206
0.788	0.652	0.348	0.136			0.963	0.775	0.225	0.188
0.85	0.719	0.281	0.131			0.963	0.843	0.157	0.12
0.263	0.146	0.854	0.117			0.15	0.045	0.955	0.105
0.813	0.697	0.303	0.116			0.975	0.888	0.112	0.087
0.913	0.798	0.202	0.115			1	0.944	0.056	0.056
0.55	0.438	0.562	0.112			0.075	0.034	0.966	0.041
0.2	0.112	0.888	0.088			0.063	0.034	0.966	0.029
0.913	0.831	0.169	0.082			1	0.978	0.022	0.022
0.675	0.596	0.404	0.079			0.05	0.034	0.966	0.016
0.213	0.135	0.865	0.078			0.012	0.011	0.989	0.001
0.163	0.101	0.899	0.062			0	0	1	0
0.6	0.539	0.461	0.061			1	1	0	0
0.15	0.09	0.91	0.06
0.1	0.045	0.955	0.055
0.125	0.079	0.921	0.046
0.075	0.034	0.966	0.041
0.063	0.022	0.978	0.041
0.938	0.899	0.101	0.039
1	0.966	0.034	0.034
0.038	0.011	0.989	0.027
1	0.978	0.022	0.022
0.988	0.966	0.034	0.022
0.95	0.933	0.067	0.017
0.913	0.899	0.101	0.014
0.025	0.011	0.989	0.014
0.013	0	1	0.013
1	0.989	0.011	0.011
0.963	0.955	0.045	0.008
1	1	0	0
0	0	1	0

## Sheet: 原始数据
分组	姓名	性别	年龄（岁）	疼痛部位	胫骨上角（°）	股骨下角（°）	髁间窝宽度（mm）	双髁间宽度（mm）	NWI	髁间窝深度（mm）	髁间角（°）	胫骨平台后倾角（°）	身高（cm）	体重（kg）	BMI	损伤机制	疼痛时间（月）
1	邵静	2	47	1	91	79	22.1	65.89	0.335407	29.92	47	6	164	55	20.4491	3	1
1	赵锐斌	1	47	1	93	83	24.65	82.65	0.298246	26.18	72	6	183	87	25.9787	3	0.5
1	贺子莲	2	51	1	93	78	15.36	69.6	0.22069	27.64	43	5	161	65	25.0762	3	12
1	胡凤玲	2	53	1	93	78	14.85	63.95	0.232213	23.88	54	7	155	64	26.6389	3	2
1	宋强	1	19	1	92	80	21.23	73.67	0.288177	27.94	61	7	183	85	25.3815	1	0.75
1	王晓冬	1	31	1	94	80	19	80.96	0.234684	26.15	60	0	187	93	26.595	3	1.3
1	高天翔	1	15	1	96	80	18.95	76.35	0.248199	31.26	44	4	165	66.5	24.4261	2	0.3
1	左少武	1	36	1	96	81	16.94	67.17	0.252196	31.21	33	12	168	70	24.8016	2	0.6
1	郑冰洋	2	19	1	93	81	16.35	64.52	0.25341	24.62	46	12	168	55	19.487	2	1
1	谢大鹏	1	27	2	94	83	19.35	77.03	0.251201	31.2	44	12	180	98	30.2469	3	1.5
1	樊江琪	1	52	2	92	82	20.72	74.08	0.279698	29.9	54	16	173	88	29.4029	2	1
1	马军	1	27	1	89	78	23.23	78.8	0.294797	31.29	53	5	170	60	20.7612	1	2
1	刘成	1	40	2	95	78	19.13	76.95	0.248603	29.78	49	8	165	66.5	24.4261	3	3
1	杜香雨	2	38	1	92	79	17.73	67.35	0.263252	27.05	51	11	163	70	26.3465	3	3
1	赵金武	1	49	1	92	81	19.43	76.69	0.253358	27.61	55	8	173	70	23.3887	2	0.8
1	王小利	2	51	1	96	81	16.39	64.18	0.255376	25.29	47	6	162	65	24.7676	3	3
1	李丹	2	30	1	93	77	17.92	65.55	0.273379	25.61	50	5	161	65	25.0762	2	8
1	柴慧	2	31	2	95	80	19.39	68.97	0.281137	24.67	59	10	177	60	19.1516	1	0.3
1	裴学芳	2	45	1	95	80	16.2	65.19	0.248504	27.01	48	9	161	60	23.1473	3	0.3
1	赵芳	2	24	2	96	78	15.46	61.6	0.250974	26.8	45	5	162	80	30.4832	3	0.2
1	谢红霞	2	48	2	93	82	15.72	66.49	0.236427	26.05	52	11	163	73	27.4756	3	1
1	史学义	1	62	1	90	79	20.32	75.99	0.267404	30.72	50	10	165	67	24.6097	3	0.2
1	耿昀哲	1	13	2	91	85	15.73	72.36	0.217385	25.61	47	12	168	75	26.5731	2	6
1	王生龙	1	48	2	90	78	20.61	67.64	0.304701	26.16	62	12	165	66.5	24.4261	3	4
1	万齐家	1	33	1	93	85	15.24	73.61	0.207037	31.26	36	12	175	81	26.449	3	1
1	王宇琪	1	13	2	96	82	18.8	78.92	0.238216	29.86	55	7	172	70	23.6614	3	0.2
1	罗韩堃	1	25	1	94	83	26	80.9	0.321384	32.2	57	9	175	95	31.0204	3	1
1	刘瑞	2	37	2	91	82	14.89	65.89	0.225983	26.64	41	12	158	50	20.0288	1	0.2
1	化新虎	1	51	1	94	83	21.86	78.87	0.277165	25.92	69	4	168	75	26.5731	3	0.4
1	李硕益	1	17	2	94	79	22.91	80.42	0.284879	31	54	6	175	78	25.4694	3	3
1	高仲海	1	43	2	96	80	19.2	77.31	0.248351	27.83	45	5	172	85	28.7317	1	2
1	王万春	1	42	1	91	80	24.32	79.82	0.304686	29.53	57	4	178	61	19.2526	3	1
1	尹浩喆	1	15	2	92	80	21.35	77.26	0.27634	28.43	60	8	175	75	24.4898	2	12
1	韩镇宇	1	18	2	97	81	22.14	76.36	0.289942	34.75	41	9	187	73	20.8756	2	3
1	陈静	2	32	1	93	81	19.34	66.56	0.290565	26.05	55	9	163	46	17.3134	1	6
1	何家杰	1	18	2	92	82	21.79	78.06	0.279144	31.57	46	14	170	77.5	26.8166	2	6
1	常晓辉	1	39	1	94	83	20.71	77.75	0.266367	29.59	52	6	170	85	29.4118	3	0.3
1	谷宁	1	38	1	95	81	19.5	80.07	0.243537	30.02	46	4	178	122.5	38.663	1	5
1	马忠智	1	56	1	94	81	22.98	78.9	0.291255	27.64	53	6	175	80	26.1224	3	0.3
1	吴晶	2	45	1	96	79	17.92	74.53	0.24044	28.08	47	1	173	100	33.4124	3	1
1	王月英	2	57	1	91	83	18.67	69.13	0.270071	25.7	49	10	167	65	23.3067	3	3
1	郭义	1	53	1	98	78	21.2	74.02	0.286409	30.65	42	1	170	85	29.4118	1	0.05
1	郭正凯	1	36	2	94	84	14.51	71.56	0.202767	25.08	40	13	175	70	22.8571	3	1
1	吴书文	1	42	2	96	80	18.61	78.66	0.236588	30.66	44	6	167	80	28.6851	2	1
1	王茜玲	2	24	2	94	81	20.06	70.02	0.28649	27.15	53	7	160	72.5	28.3203	1	0.5
1	王思巍	1	18	2	97	83	19.07	77.03	0.247566	26.61	58	13	176	80	25.8264	2	3
1	安翠英	2	51	1	91	79	19.4	70.81	0.273973	29.81	46	9	165	66	24.2424	2	12
1	马俊杰	1	43	1	95	77	22.18	76.16	0.291229	35.77	42	1	174	60	19.8177	3	0.5
1	李江飞	1	26	2	92	86	21.56	79.52	0.271127	27.46	63	9	180	98	30.2469	1	0.1
1	孙潇	1	34	2	96	81	16.18	77.3	0.209314	31.08	36	5	178	100	31.5617	3	0.7
1	王勤	2	51	2	94	79	18.52	68.22	0.271475	28.37	43	6	165	70	25.7117	3	0.2
1	马建军	2	53	1	91	80	14.19	65.17	0.217738	26.17	34	10	163	60.5	22.7709	3	0.6
1	闫逸轩	1	16	2	97	80	22.62	80.73	0.280193	33.96	45	5	182	80	24.1517	3	0.1
1	宋守善	1	60	2	93	81	23.44	72.27	0.324339	31.27	46	11	165	70	25.7117	1	0.7
1	靳文政	1	57	2	93	82	17.27	75.56	0.22856	24.52	63	2	169	74	25.9095	2	0.7
1	丁波	1	37	2	95	80	21.57	76.38	0.282404	30.18	55	6	183	92	27.4717	2	2.4
1	布日德	1	28	1	91	83	21.59	75.78	0.284904	33.51	45	7	178	95	29.9836	1	3
1	王涤	1	16	2	92	83	24.14	79.13	0.305068	26.7	68	6	173	53	17.7086	1	36
1	高彩红	2	42	2	91	82	17.28	67.33	0.256646	27.8	41	6	160	60	23.4375	2	1.7
1	王金会	2	48	1	91	79	15.83	67.4	0.234866	31.3	33	10	173	72	24.0569	1	1
1	李小红	2	29	2	93	78	20.56	67.53	0.304457	26.78	56	10	160	50	19.5312	3	1
1	王杰	1	39	2	97	83	19.82	80.86	0.245115	30.82	45	10	175	92	30.0408	3	0.2
1	陈俊祺	1	56	1	96	80	15.79	73.45	0.214976	27.86	32	6	170	52	17.9931	3	4
1	武青芸	2	36	2	96	79	19.77	66.04	0.299364	28.3	52	8	163	67	25.2174	3	0.1
1	吴海兵	1	42	2	99	79	24.74	81.43	0.303819	30.02	61	3	176	80	25.8264	2	0.4
1	巍康	1	24	2	99	83	22.9	81.13	0.282263	29.27	57	7	178	76	23.9869	1	0.2
1	简艳丽	2	41	2	94	80	15.57	66.53	0.23403	26.32	42	10	160	61	23.8281	3	2.7
1	拜建辉	1	30	2	96	79	20.61	74.48	0.276719	27.84	53	5	175	90	29.3878	3	0.5
1	陆伟	1	34	2	98	79	17.11	72.7	0.235351	31.02	35	11	174	83	27.4145	2	0.2
1	王淅	2	46	2	94	84	18.29	68.37	0.267515	27.29	53	8	168	53	18.7783	3	2
1	张朋飞	1	45	2	95	82	18.96	74.31	0.255147	28.7	50	4	168	90	31.8878	3	0.1
1	田肖清凡	2	27	2	97	83	18.68	66.45	0.281114	27.25	49	17	165	50	18.3655	1	0.4
1	徐亚波	2	44	2	93	80	19.02	62.18	0.305886	25.14	54	11	157	65.5	26.5731	3	4
1	陈甜甜	2	20	2	94	83	20.35	65.71	0.309694	27.19	54	6	163	70	26.3465	3	0.1
1	吴燕蓉	2	40	2	92	82	16.85	62.35	0.270249	25.23	45	10	165	72.5	26.6299	3	24
1	杨晓梅	2	37	2	93	83	17.86	63.82	0.27985	25.49	51	4	160	64	25	3	36
1	韩进燕	2	36	2	96	82	16.42	68.28	0.24048	25.44	51	17	159	70	27.6888	3	1
1	王瑞龙	1	26	1	97	81	20.64	70.51	0.292724	26.54	59	6	158	60	24.0346	2	0.3
1	张金霞	2	43	2	97	81	14.84	66.79	0.222189	26.46	41	9	160	60	23.4375	3	0.2
1	李轩宇	1	36	1	99	81	22.45	80.71	0.278156	30.62	46	5	175	75	24.4898	3	5
0	王吉成	1	47	1	91	82	16.92	74.54	0.226992	28.14	38	8	177	68	21.7051	2	60
0	郭颖东	1	51	2	96	83	18.59	76.55	0.242848	28.7	39	9	168	64	22.6757	3	4
0	刘兰英	2	55	2	91	81	17.22	67.72	0.254282	26.03	47	10	160	54	21.0938	3	0.7
0	马婷	2	38	1	94	79	17.54	65.93	0.26604	25.12	48	7	162	53	20.1951	3	0.2
0	雷冰霜	2	59	1	93	77	16.13	68.74	0.234652	26.56	35	0	156	50	20.5457	1	0.1
0	刘志翔	1	21	1	92	79	15.95	77.47	0.205886	30.51	35	10	180	70	21.6049	3	0.1
0	高杰	1	36	1	95	84	17.41	73.24	0.237712	33.25	29	7	185	87	25.42	2	3
0	邓圣元	1	25	1	92	83	19.82	77.31	0.25637	30.04	47	9	180	74	22.8395	2	0.2
0	马莲花	2	38	2	96	79	16.51	66.67	0.247638	27.21	41	7	163	59	22.2063	2	6
0	王文轩	1	16	1	94	81	19.54	75.92	0.257376	31.41	48	7	185	87	25.42	2	0.7
0	窦琳翔	2	14	1	94	76	13.93	62.89	0.221498	27.42	37	1	160	52	20.3125	3	1
0	汤泽祥	1	55	1	94	85	16.19	71.13	0.227611	29.04	37	18	168	70	24.8016	2	8
0	马杰	1	37	2	97	81	20.35	77.6	0.262242	30.01	51	11	175	80	26.1224	2	3
0	任小蓉	2	34	1	92	79	19.49	69.49	0.280472	23.29	69	14	158	48	19.2277	3	0.3
0	李斌	1	52	2	96	83	19.69	72.22	0.272639	27.59	41	11	165	74	27.1809	2	3
0	马迎冬	1	52	1	93	81	21.6	80.65	0.267824	27.7	52	6	178	70	22.0932	1	1
0	李翰泽	1	26	2	97	83	19.45	74.12	0.262412	28.57	50	18	170	69	23.8754	2	0.7
0	魏业红	1	50	2	96	83	20.17	77.97	0.258689	28.47	48	15	170	69	23.8754	2	0.1
0	詹佳庆	1	31	1	92	82	20.02	77.1	0.259663	32.12	39	17	183	95	28.3675	2	96
0	马利东	1	19	2	93	81	19.12	81.81	0.233712	36.53	33	15	180	81	25	2	0.5
0	哈伦	1	35	1	90	83	16.42	77.46	0.21198	28.53	49	11	182	88	26.5668	2	0.5
0	张勇	1	27	2	91	85	22.08	81.87	0.269696	31.88	38	15	175	80	26.1224	2	120
0	王光付	1	59	2	96	84	21.13	78.23	0.270101	26.05	60	10	168	65	23.03	2	12
0	杨嘉辉	1	25	2	94	81	20.74	75.73	0.273868	31.2	47	15	185	95	27.7575	2	0.1
0	王俊程	1	23	1	93	81	19.81	75.66	0.261829	30.76	46	16	184	85	25.1063	2	0.5
0	秦华樱	2	33	2	94	82	15.15	67.14	0.225648	32.95	34	19	176	87	28.0863	2	0.3
0	刘小平	1	53	2	94	80	17.78	72.1	0.246602	33.21	30	17	181	85	25.9455	3	1
0	马龙	1	25	1	97	81	18.87	71.93	0.262338	31	39	10	170	62	21.4533	2	0.2
0	尹正茂	1	25	2	95	83	21.46	83.59	0.256729	34.73	37	19	198	140	35.7106	2	1
0	贺景豪	1	25	2	95	83	16.31	71.82	0.227096	25.46	50	12	172	85	28.7317	2	2
0	武梓晗	2	13	1	90	76	18.15	64.02	0.283505	24.49	60	10	160	65	25.3906	2	3
0	王芳芳	2	54	2	93	79	18.66	67.83	0.2751	29.36	38	13	167	66	23.6652	2	10
0	朱建国	1	55	1	88	81	20.04	77.79	0.257617	27.83	47	8	175	72	23.5102	2	0.3
0	金芮	2	23	2	95	79	16.57	64.26	0.257859	25.36	44	11	162	57	21.7193	2	0.7
0	多利荣	1	44	1	96	81	19.73	74.09	0.266298	29.92	42	7	168	84	29.7619	1	1
0	许立军	1	49	1	91	81	17.27	74.09	0.233095	28.78	43	7	165	75	27.5482	3	0.2
0	姬雪健	1	28	2	94	80	21.84	78.75	0.277333	29.02	54	7	182	92	27.7744	2	2
0	刘秀梅	2	58	2	92	81	23.71	68.02	0.348574	24.52	58	12	162	65	24.7676	2	1
0	兰辉	1	44	2	95	81	21.13	72.01	0.293431	26.8	51	15	167	79	28.3266	2	2
0	闵锐	1	34	2	92	86	18.93	76.94	0.246036	29.87	40	11	175	90	29.3878	2	0.3
0	刘志鹏	1	38	1	96	83	21.68	78.25	0.277061	30.07	53	4	180	84	25.9259	2	0.2
0	海琴	2	48	1	93	80	20.34	70.97	0.2866	24.76	56	7	160	61	23.8281	2	0.2
0	汪武恒	1	40	1	95	77	20.84	76.68	0.271779	27.7	53	6	171	70	23.939	2	2
0	禹临安	1	17	1	95	83	17.22	75.53	0.227989	34.81	34	12	185	100	29.2184	2	1
0	李晨	2	36	1	92	78	18.08	64.29	0.281226	27.12	48	8	166	69	25.0399	2	0.3
0	王蕊馨	2	20	1	94	78	18.71	67.32	0.277926	28.62	49	16	164	64	23.7954	2	0.2
0	刘星月	2	25	1	96	77	13.4	63.85	0.209867	26.48	37	1	160	54	21.0938	2	0.2
0	史丽媛	2	32	1	90	79	19.62	70.49	0.278337	27.78	57	7	168	80	28.3447	2	1
0	王娜	2	37	1	90	81	15.29	63.41	0.241129	24.5	43	14	165	69	25.3444	3	0.2
0	蔡波	1	37	1	95	84	21.9	77.16	0.283826	31.24	37	17	178	90	28.4055	3	3
0	邓洋	1	33	2	94	83	23.1	75.37	0.306488	26.89	59	13	180	70	21.6049	1	5
0	甘磊	1	35	1	92	83	19.77	78.62	0.251463	30.1	46	11	170	73	25.2595	1	2
0	王文飞	1	26	2	96	82	20.34	76.66	0.265327	33.95	31	12	183	90	26.8745	2	0.2
0	徐金花	2	57	2	94	78	16.73	64.85	0.25798	25.18	49	11	155	71	29.5525	3	0.3
0	杨磊	1	34	1	92	82	21.06	74.27	0.28356	29.53	49	7	171	74	25.3069	2	1
0	马海成	1	20	2	96	85	21.96	72.83	0.301524	24.23	62	11	170	71	24.5675	2	5
0	黄淑田	2	29	2	97	81	17.03	68.1	0.250073	29.83	35	11	167	60	21.5139	2	0.2
0	余佳	2	34	1	91	79	20.22	70.11	0.288404	24.77	56	8	168	61	21.6128	3	0.5
0	任凯杰	1	23	1	91	81	24.27	80.04	0.303223	29.29	55	11	172	71	23.9995	2	0.5
0	马上儿	2	26	1	91	81	15.63	67.76	0.230667	26	43	9	164	75	27.8852	2	1
0	申展	1	35	1	97	80	22.41	69.09	0.32436	32.11	37	12	180	73	22.5309	2	0.2
0	张海娟	2	41	1	92	77	17.3	67.21	0.257402	25.08	47	13	168	70	24.8016	2	2
0	王帅	1	38	2	95	79	18.44	75.6	0.243915	30.22	43	7	172	76	25.6896	2	0.2
0	张旭霞	2	39	1	90	81	17.77	70.22	0.253062	26.72	42	12	161	57	21.9899	2	0.4
0	赵嘉明	1	20	2	95	81	24.23	81.27	0.298142	33.26	48	5	185	120	35.0621	3	0.2
0	李翔	1	20	2	94	82	17.16	78.23	0.219353	27.32	53	10	185	75	21.9138	2	0.9
0	王学兵	1	65	1	91	82	18.75	75	0.25	25.18	60	10	171	65	22.2291	2	0.7
0	马永凯	1	22	2	95	80	24.02	84.81	0.283221	35.63	44	12	193	87	23.3563	2	2
0	王恒	1	18	1	97	81	18.64	74.23	0.251111	28.88	47	8	175	75	24.4898	3	12
0	田进虎	1	25	1	92	78	19.32	78.61	0.24577	31.08	44	14	170	80	27.6817	2	1
0	张东	1	32	1	94	81	19.57	72.37	0.270416	26.34	52	9	168	80	28.3447	2	0.1
0	潘薇	2	34	2	90	81	18.97	66.32	0.286037	26.3	49	9	165	75	27.5482	2	0.2
0	韩秀玲	2	49	1	87	83	16.88	66.55	0.253644	23.78	47	16	158	55	22.0317	2	48
0	杨东旭	1	37	2	94	82	21.35	78.24	0.272878	29.25	47	12	176	75	24.2123	2	0.7
0	李万虎	1	49	2	94	81	19.81	80.51	0.246056	29.77	48	11	180	85	26.2346	3	0.5
0	王玉鹏	1	30	1	95	81	20.66	80.86	0.255503	29.65	51	17	172	100	33.8021	2	0.3
0	王臻琪	1	19	2	92	82	22.38	79.47	0.281616	32.95	46	9	183	112	33.4438	2	1.4
0	吴学峰	1	44	2	92	82	17.53	70.11	0.250036	26.19	41	14	160	60	23.4375	2	0.5
0	朱永唤	2	48	1	94	80	17.33	67.19	0.257925	25.43	46	9	158	58	23.2335	2	36
0	李莉	2	37	2	94	79	18.92	67.53	0.280172	26.52	47	17	162	57	21.7193	3	0.2
0	毛生刚	1	59	2	95	85	24.15	79.98	0.30195	28.84	61	7	175	65	21.2245	2	2
0	杜丽平	2	49	1	88	82	17.12	71.7	0.238773	26.75	44	18	168	71	25.1559	2	8
0	罗永通	1	31	2	91	80	21.11	81.24	0.259847	31.5	52	9	176	74	23.8895	2	0.1
0	李春年	1	37	1	96	81	22.17	76.54	0.289652	29.65	50	14	179	75	23.4075	2	0.4
0	马丰霞	2	48	1	93	78	18.87	69.22	0.272609	25.13	49	16	165	64	23.5078	2	12
0	冯浩	1	27	2	95	82	21.34	75.36	0.283174	21.34	63	12	173	60	20.0474	3	0.1
0	刘乙锌	1	28	2	96	80	20.69	77.58	0.266692	30.34	45	12	176	70	22.5981	2	0.2
0	赵冬涛	1	44	2	95	82	19.94	72.36	0.275567	27.58	52	15	162	70	26.6728	2	0.6
0	白彬	2	51	2	94	81	15.49	67.57	0.229244	24.85	46	14	170	72	24.9135	3	1
